# Supplementary material for: Off–on–off fluorescent chemosensor for pH measurement with a terbium(iii) complex based on a tripodal salicylic-acid derivative
Source: Royal Society of Chemistry journal article supplement (doi:10.1039/c3ob41319e), 2013-01-01
Supplement: c3ob41319e.pdf [file c3ob41319e.pdf]

Supporting Information for

# “Off–On–Off” Fluorescent Chemosensor for pH Measurement with Terbium(III) Complex Based on a Tripodal Salicylic-Acid Derivative

Yan-Ling Yang, Ya-Wen Wang, Dong-Zhu Duan, Ai-Jiang Zhang, Jian-Guo Fang and  
Yu Peng\*

*State Key Laboratory of Applied Organic Chemistry, Key Laboratory of Nonferrous Metal  
Chemistry and Resources Utilization of Gansu Province, and College of Chemistry and Chemical  
Engineering, Lanzhou University, Lanzhou 730000 (P. R. China)*

pengyu@lzu.edu.cn

## Table of Contents

|                                                                                                                                                                                          |     |
|------------------------------------------------------------------------------------------------------------------------------------------------------------------------------------------|-----|
| 1. $^1\text{H}$ , $^{13}\text{C}$ NMR and ESI–MS plots of the compound <b>2</b> ( <b>Figures S1–S3</b> ).....                                                                            | S3  |
| 2. $^1\text{H}$ , $^{13}\text{C}$ NMR, IR, and HRMS plots of the probe $\text{H}_3\text{BSA}$ ( <b>Figures S4–S7</b> ).....                                                              | S6  |
| 3. IR plots of <b>BSA•Eu</b> , <b>BSA•Gd</b> and <b>BSA•Tb</b> ( <b>Figures S8– S10</b> ).....                                                                                           | S10 |
| 4. UV-visible absorption spectrum of $\text{H}_3\text{BSA}$ in Tris-buffer ( <b>Figure S11</b> ).....                                                                                    | S13 |
| 5. Phosphorescence spectrum of <b>BSA•Gd</b> at 77K ( <b>Figure S12</b> ).....                                                                                                           | S14 |
| 6. Potentiometric titration of $\text{H}_3\text{BSA}$ ( <b>Figure S13</b> ).....                                                                                                         | S15 |
| 7. ESI-MS plot and the fluorescent spectrum of <b>BSA•Tb</b> at pH 2.0 in solution<br>( <b>Figures S14 and S15</b> ).....                                                                | S16 |
| 8. ESI-MS plot and the fluorescent spectrum of <b>BSA•Tb</b> at pH 9.0 in solution<br>( <b>Figures S16 and S17</b> ).....                                                                | S18 |
| 9. The pH dependence of the fluorescence intensity change of <b>BSA•Eu</b> ( <b>Figure<br/>S18</b> ).....                                                                                | S20 |
| 10. Fluorescence responses of <b>BSA•Tb</b> with $\text{Na}^+$ , $\text{K}^+$ , and $\text{Ca}^{2+}$ ions in different pH<br>values ( <b>Figure S19</b> ).....                           | S21 |
| 11. Fluorescence responses of <b>BSA•Tb</b> with $\text{Cu}^{2+}$ , $\text{Hg}^{2+}$ , $\text{Fe}^{2+}$ , and $\text{Fe}^{3+}$ ions in<br>different pH values ( <b>Figure S20</b> )..... | S22 |

|                                                                                                                                   |     |
|-----------------------------------------------------------------------------------------------------------------------------------|-----|
| 12. ORTEP plots of <b>BSA•Eu</b> and <b>BSA•Gd</b> ( <b>Figures S21</b> and <b>S22</b> ).....                                     | S23 |
| 13. Crystal data and structure refinement parameters for <b>BSA•Eu</b> , <b>BSA•Gd</b> and <b>BSA•Tb</b> ( <b>Table S1</b> )..... | S25 |
| 14. ESI–MS spectrum of H <sub>3</sub> <b>BSA</b> with Tb(III) in Tris-buffer solution ( <b>Figure S23</b> ).....                  | S26 |
| 15. The supramolecular structure of <b>BSA•Tb</b> ( <b>Figures S24-S26</b> ).....                                                 | S27 |

1.  $^1\text{H}$ ,  $^{13}\text{C}$  NMR and ESI-MS plots of the compound 2.

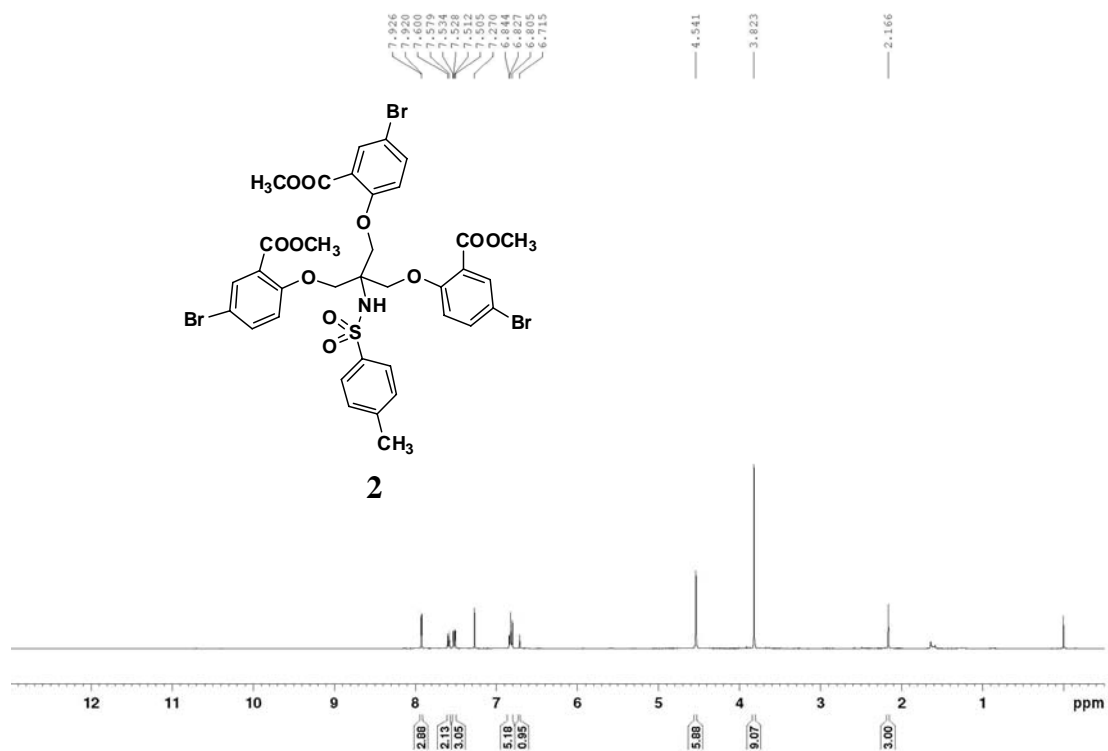

Figure S1.  $^1\text{H}$  NMR ( $\text{CDCl}_3$ , 400 MHz) spectrum of 2.

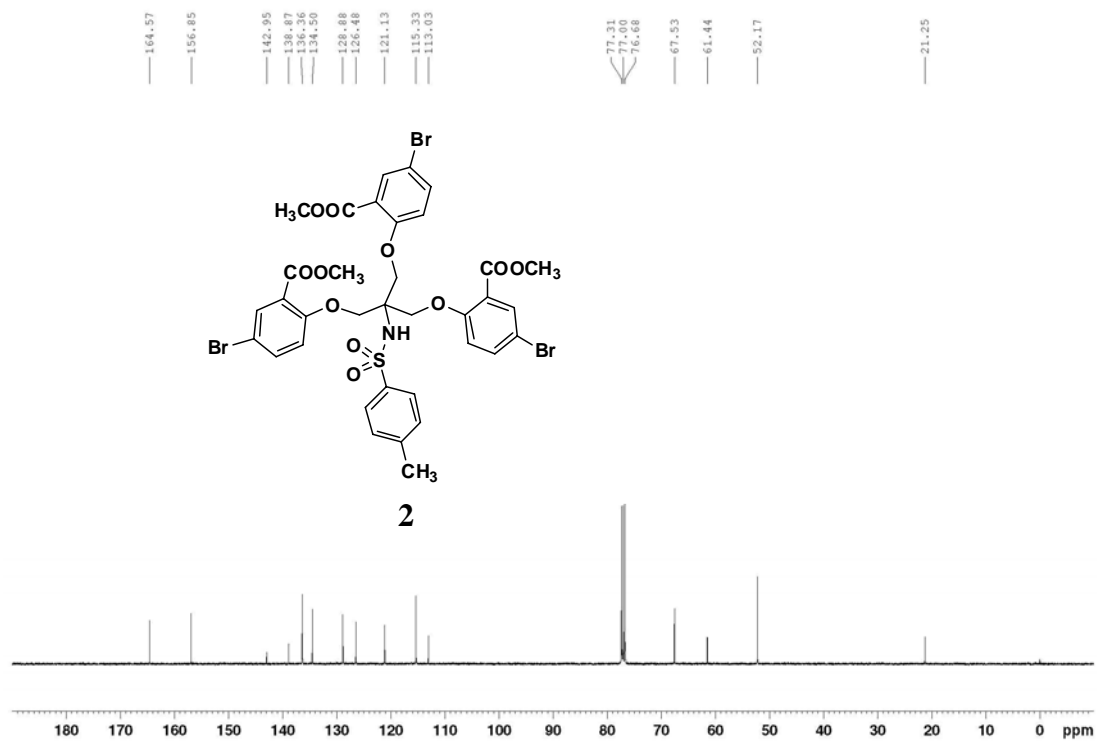

Figure S2.  $^{13}\text{C}$  NMR (CDCl<sub>3</sub>, 100 MHz) spectrum of **2**.

## Generic Display Report

### Analysis Info

Analysis Name D:\Data\YANGY\_MS\NewZHANGAIJIANG100617.d  
Method LOWmass.m  
Sample Name M=910 914.  
Comment

Acquisition Date 6/17/2010 3:52:16 PM

Operator ESQ6K  
Instrument esquire6000

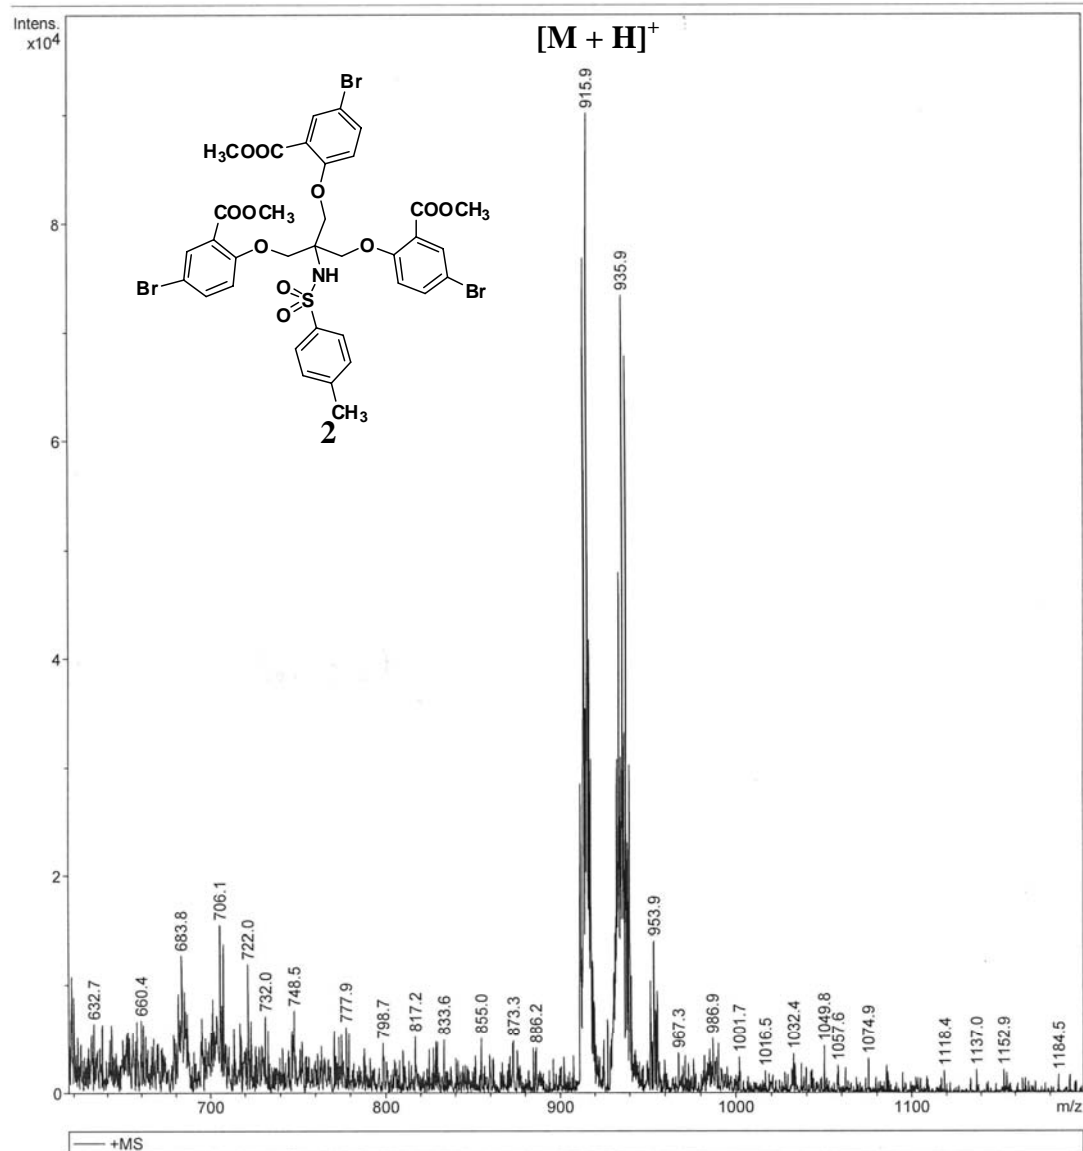

Figure S3. ESI mass spectrum of 2.

## 2. $^1\text{H}$ , $^{13}\text{C}$ NMR, IR, and HRMS plots of the probe $\text{H}_3\text{BSA}$ .

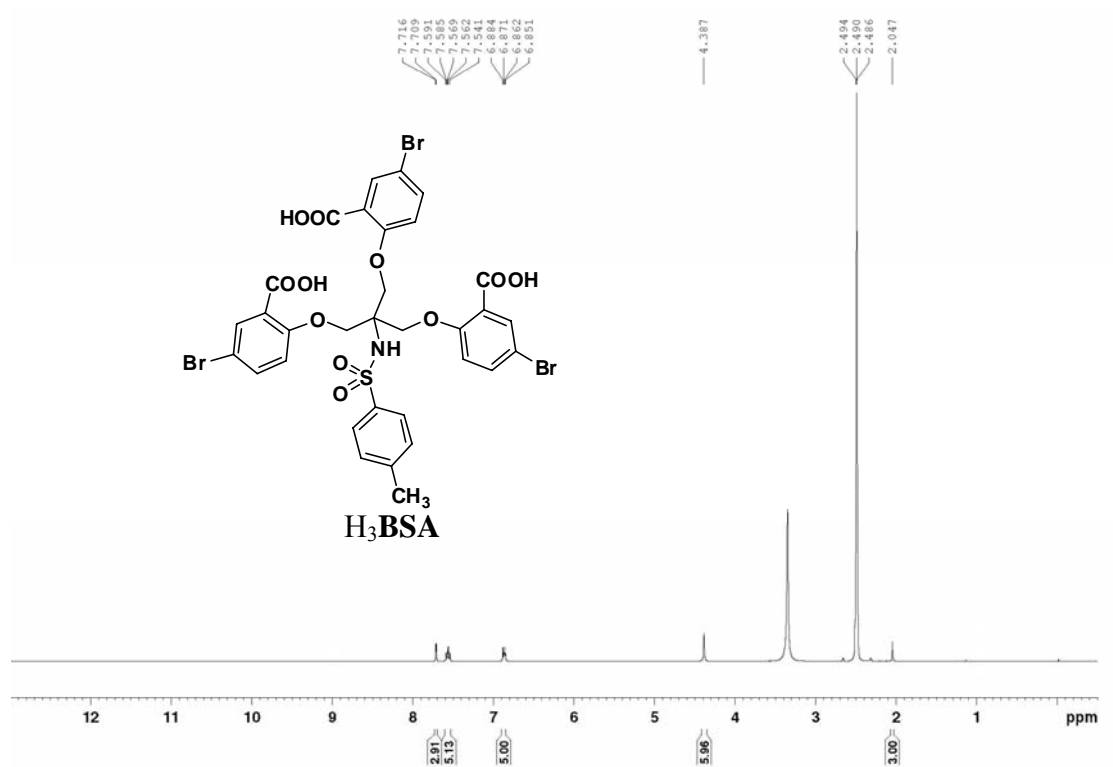

Figure S4.  $^1\text{H}$  NMR ( $\text{DMSO-}d_6$ , 400 MHz) spectrum of  $\text{H}_3\text{BSA}$ .

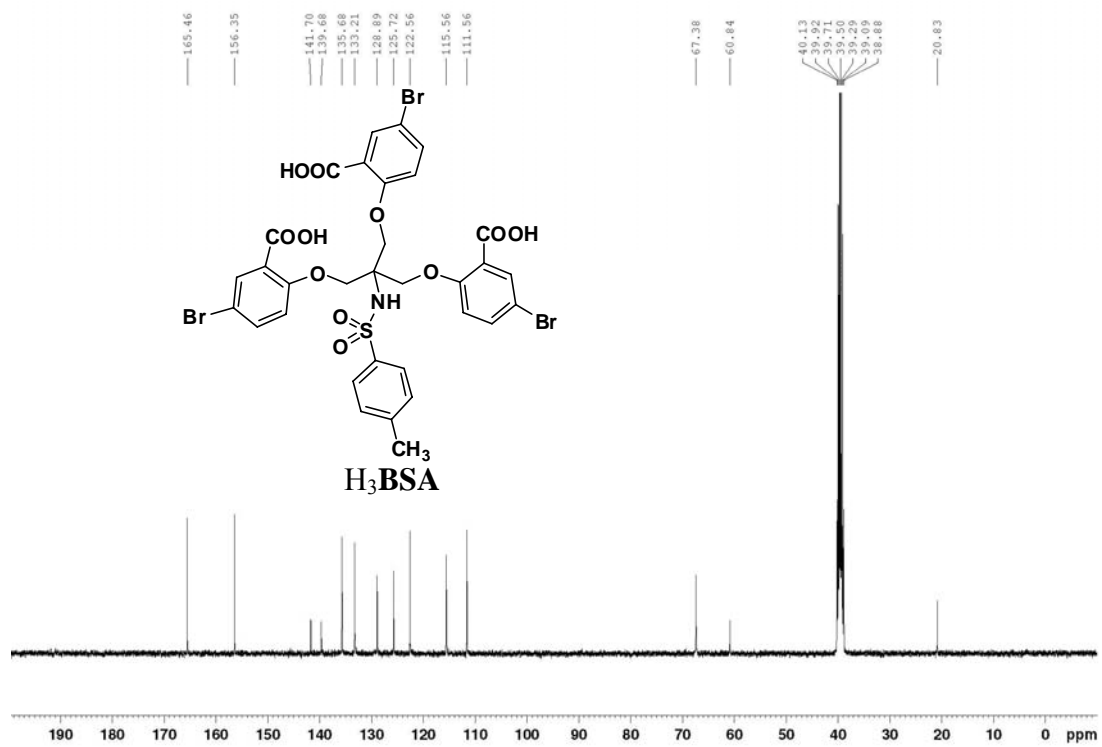

Figure S5. <sup>13</sup>C NMR (DMSO-*d*<sub>6</sub>, 100 MHz) spectrum of H<sub>3</sub>BSA.

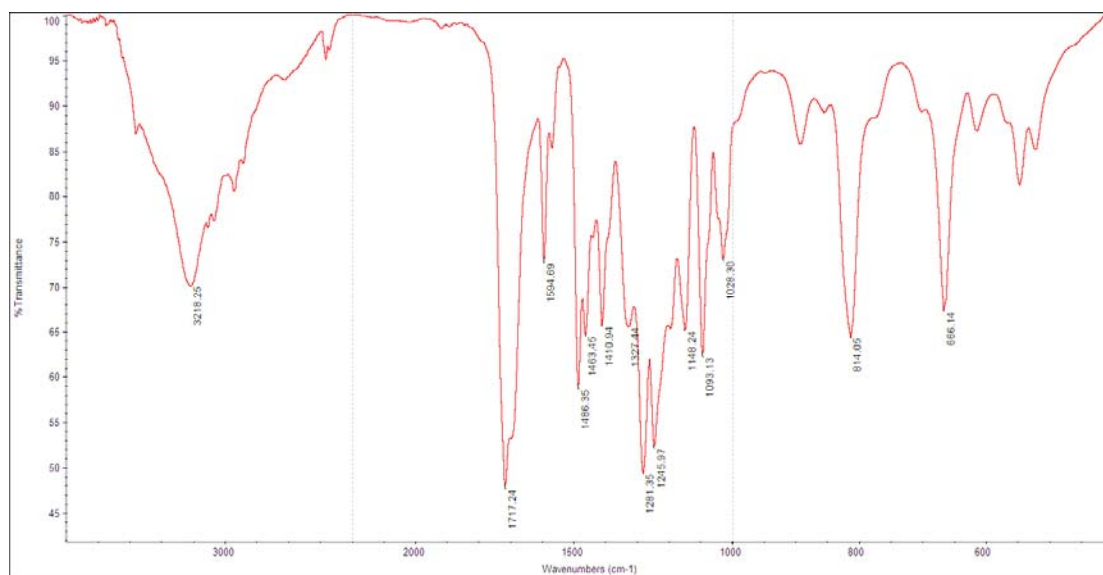

**Figure S6.** IR spectrum of H<sub>3</sub>BSA.



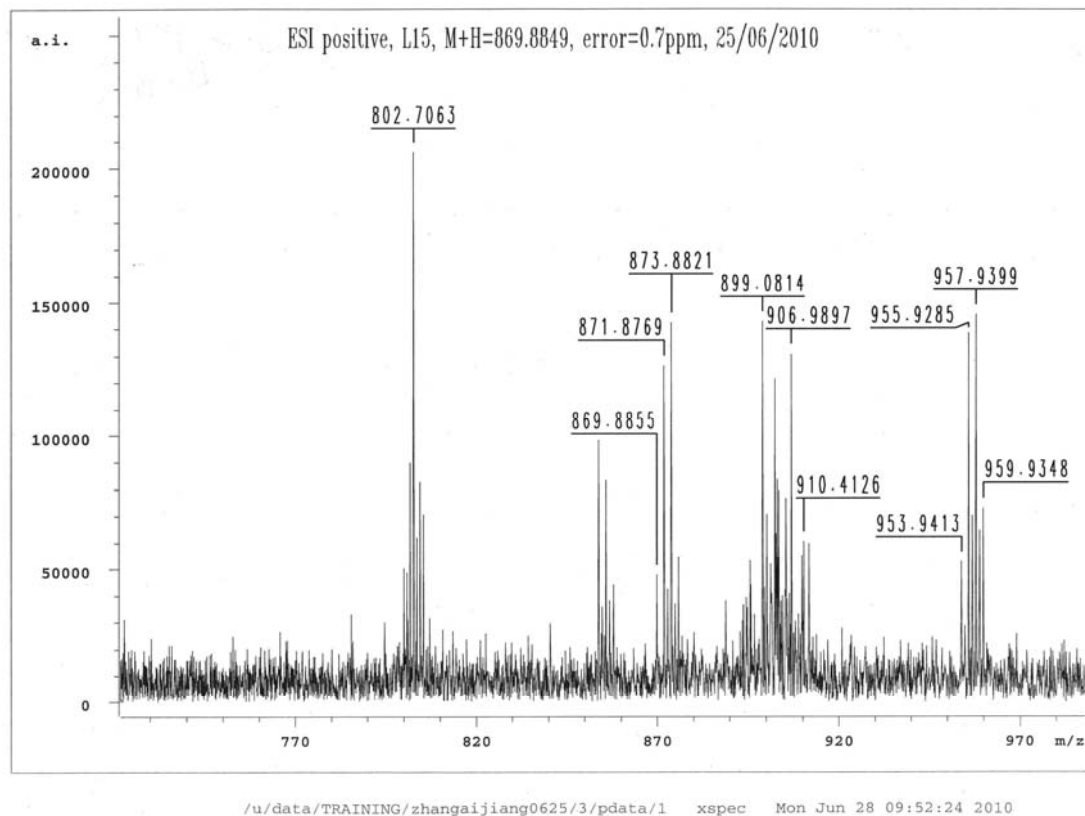

**Figure S7.** HRMS of H<sub>3</sub>BSA.

### 3. IR plots of BSA•Eu, BSA•Gd and BSA•Tb.

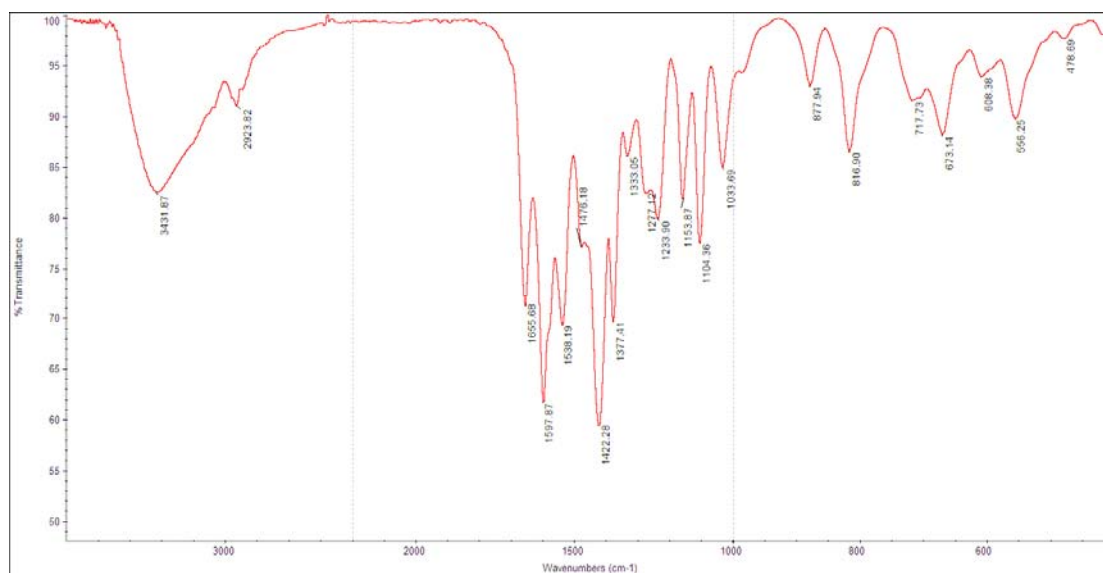

**Figure S8.** IR spectrum of BSA•Eu.

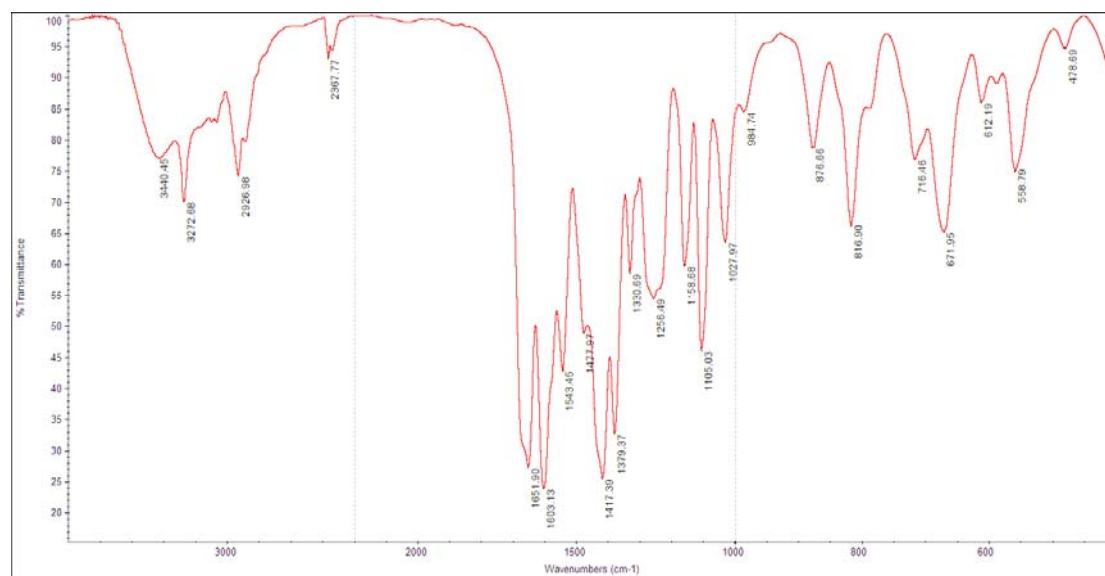

**Figure S9.** IR spectrum of BSA•Gd.

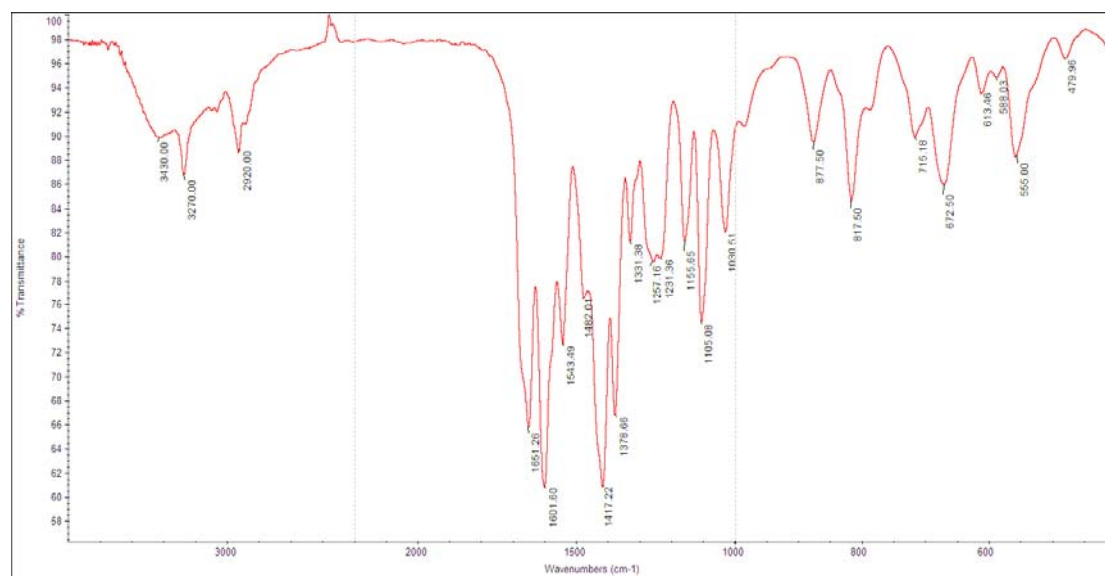

**Figure S10.** IR spectrum of **BSA•Tb**.

#### 4. UV-visible absorption spectrum of H<sub>3</sub>BSA in Tris-buffer.

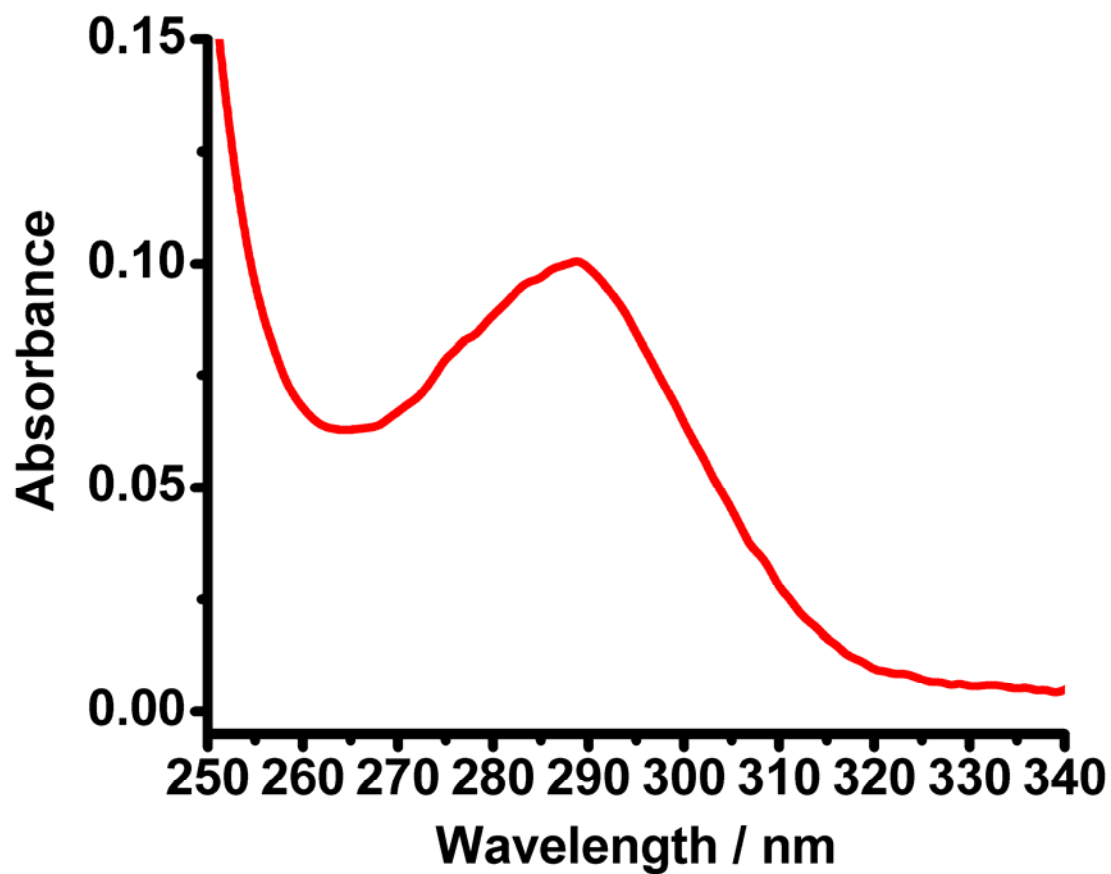

**Figure S11.** UV-visible absorption spectrum of H<sub>3</sub>BSA in Tris-buffer (1% DMSO, v/v) solution ( $1.0 \times 10^{-5}$  M).

5. Phosphorescence spectrum of BSA•Gd at 77K.

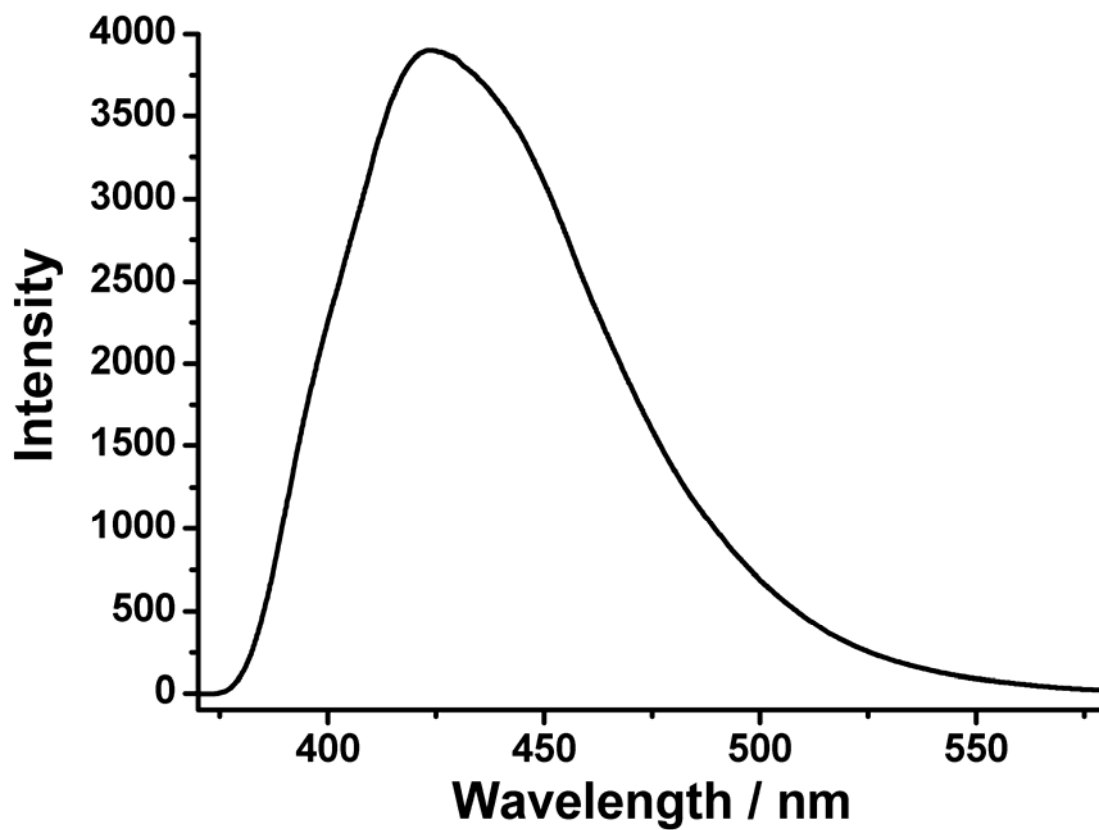

**Figure S12.** Phosphorescence spectrum of **BSA•Gd** in methanol–ethanol mixture (V : V = 1 : 1) at 77K.

## 6. Potentiometric titration of H<sub>3</sub>BSA.

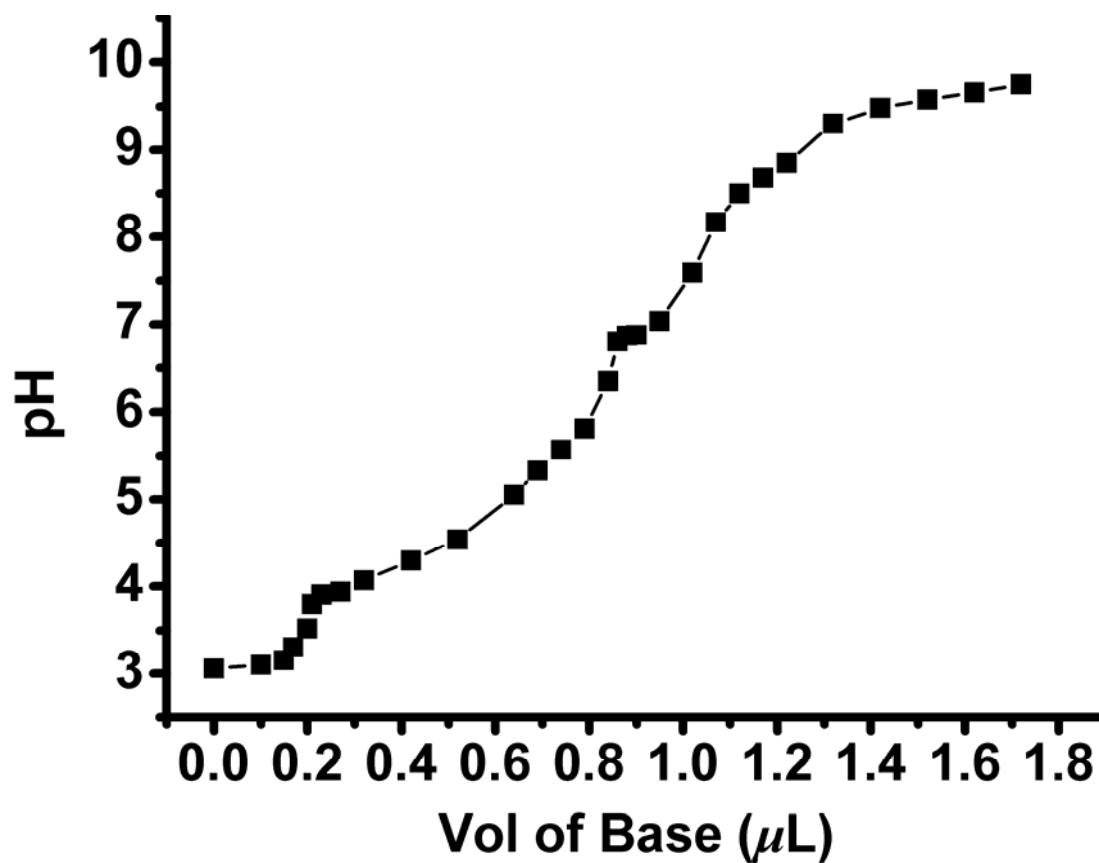

**Figure S13.** Titration plot of H<sub>3</sub>BSA in water (1% DMSO, v/v) solution. [H<sub>3</sub>BSA] =  $1.0 \times 10^{-4}$  M, [H<sup>+</sup>] = 0.01 M (HCl), [NaOH] = 0.01 M, *I* = 0.1 M (NaCl).

## 7. ESI-MS plot and the fluorescent spectrum of BSA•Tb at pH 2.0 in solution.

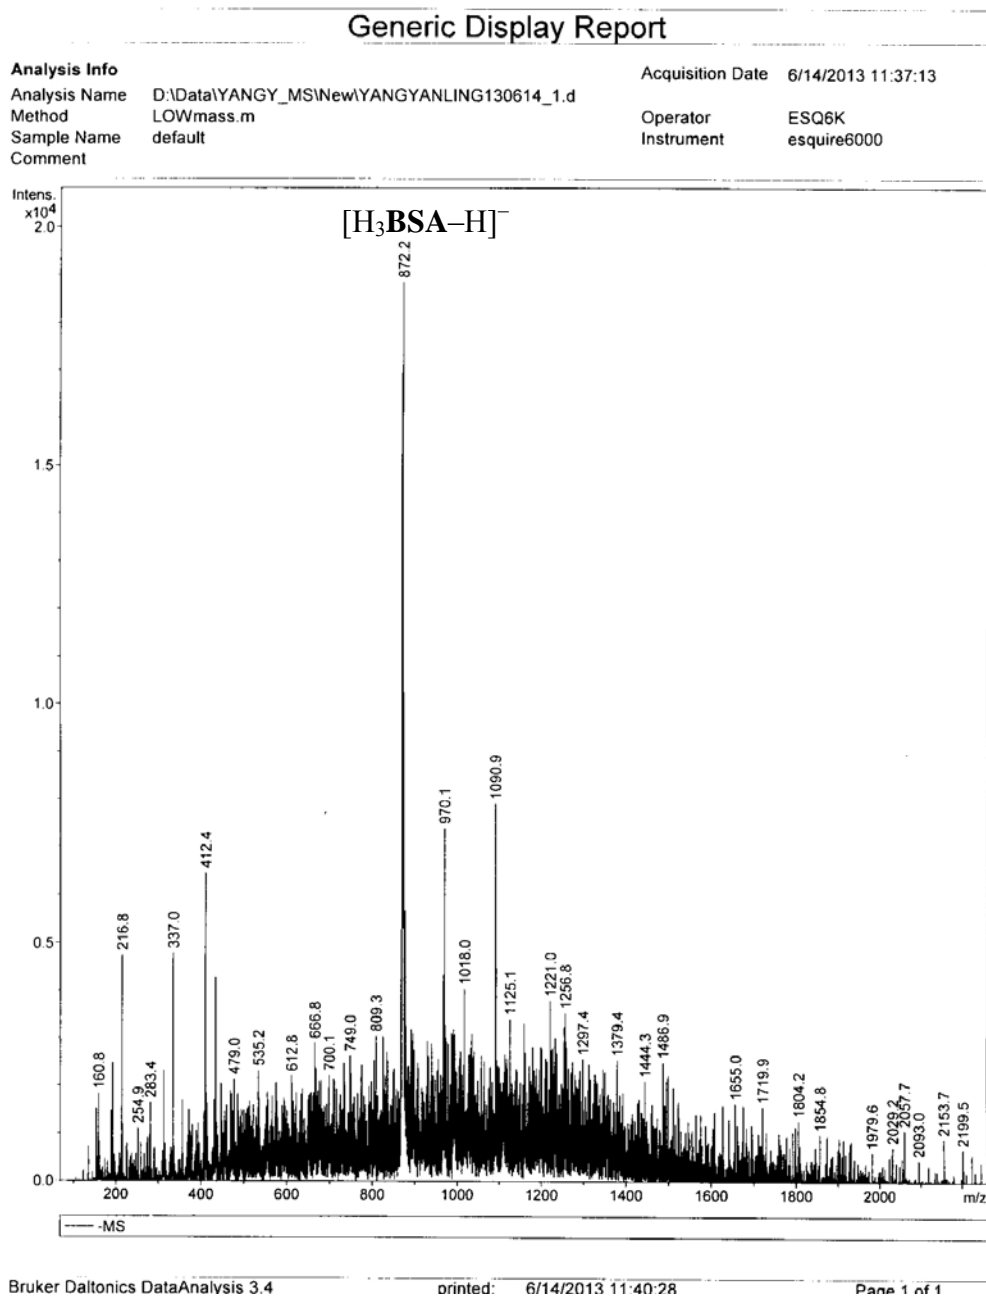

**Figure S14.** ESI mass spectrum of BSA•Tb at pH 2.0 in solution.



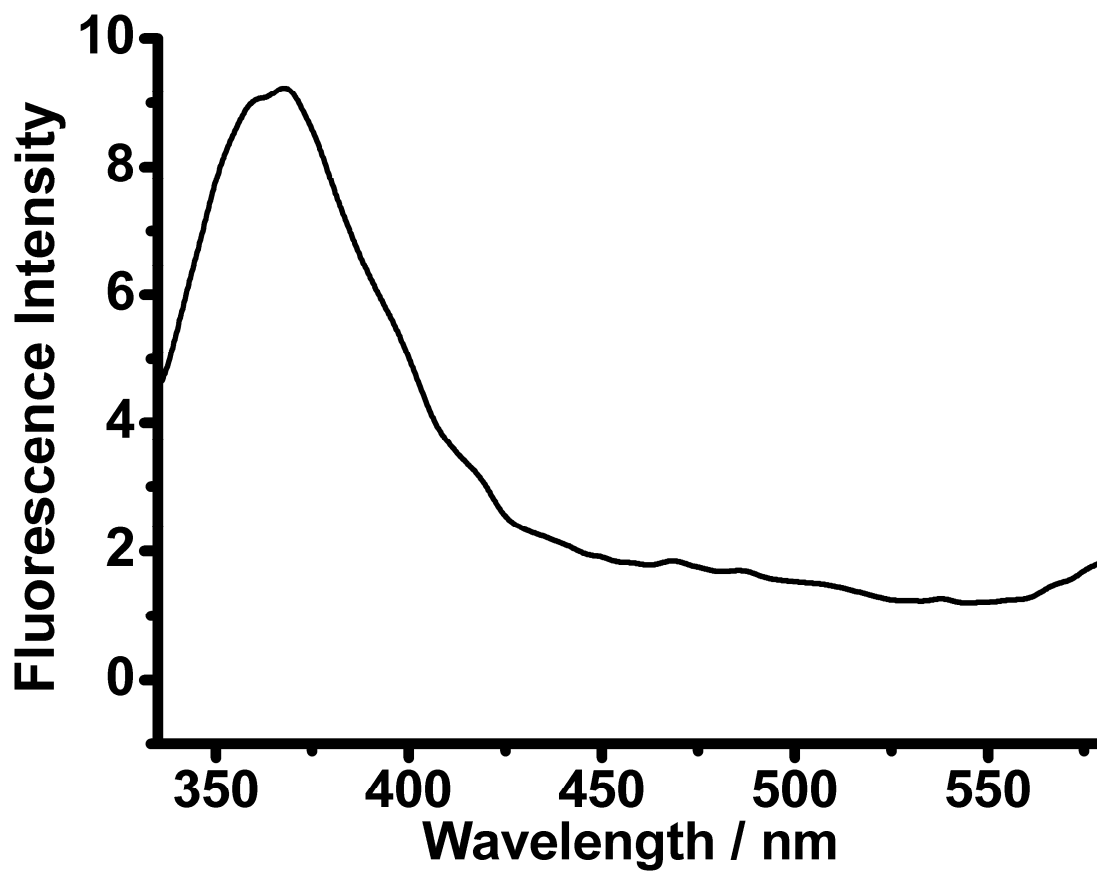

**Figure S15.** The fluorescent spectrum of **BSA•Tb** at pH 2.0 in Tris-buffer (1% DMSO, v/v) solution.

## 8. ESI-MS plot and the fluorescent spectrum of BSA•Tb at pH 9.0 in solution.

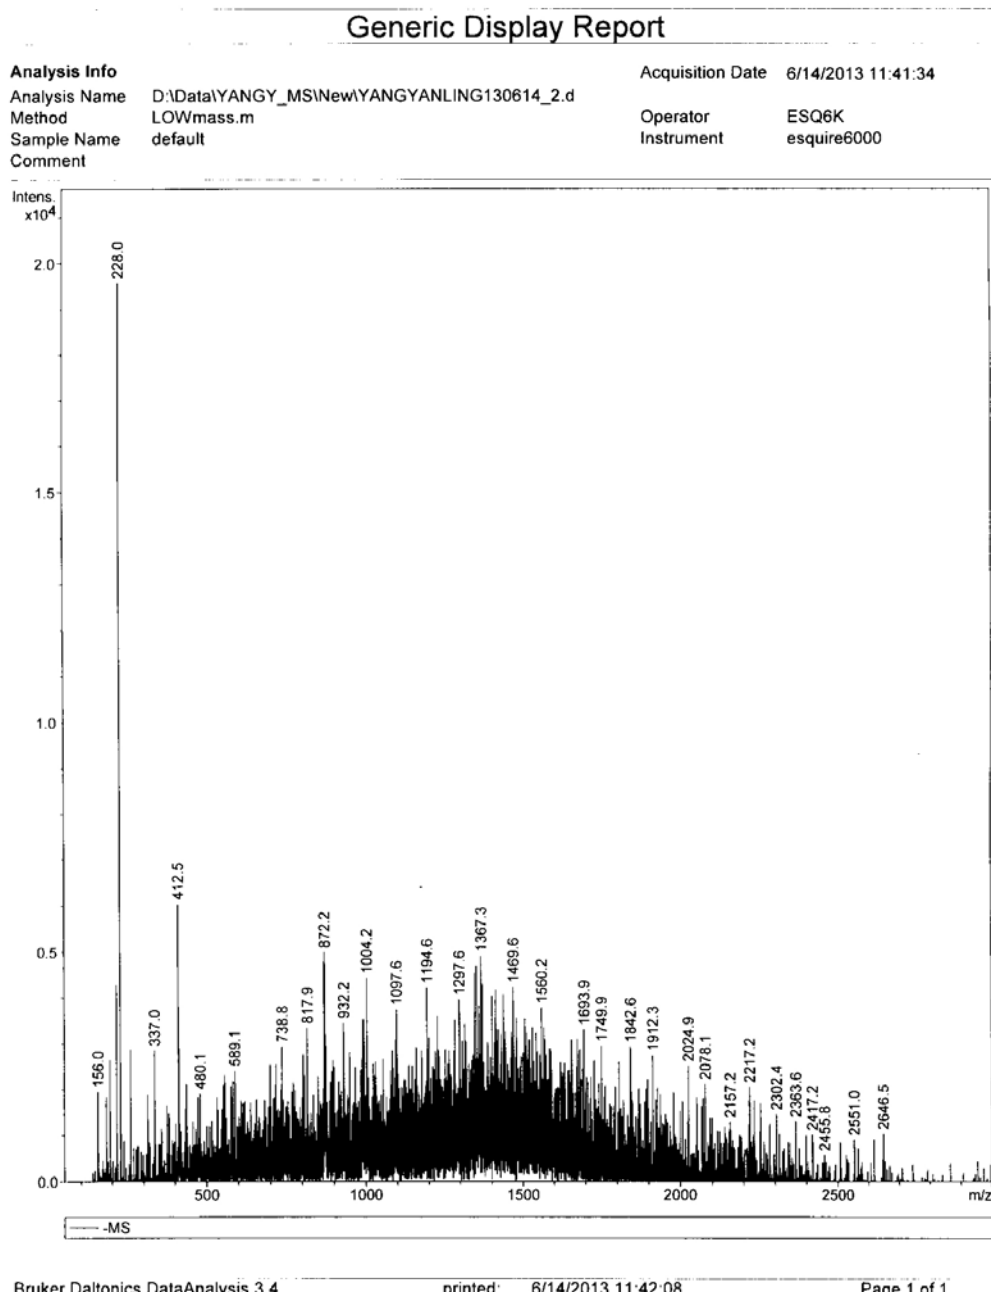

**Figure S16.** ESI mass spectrum of BSA•Tb at pH 9.0 in solution.

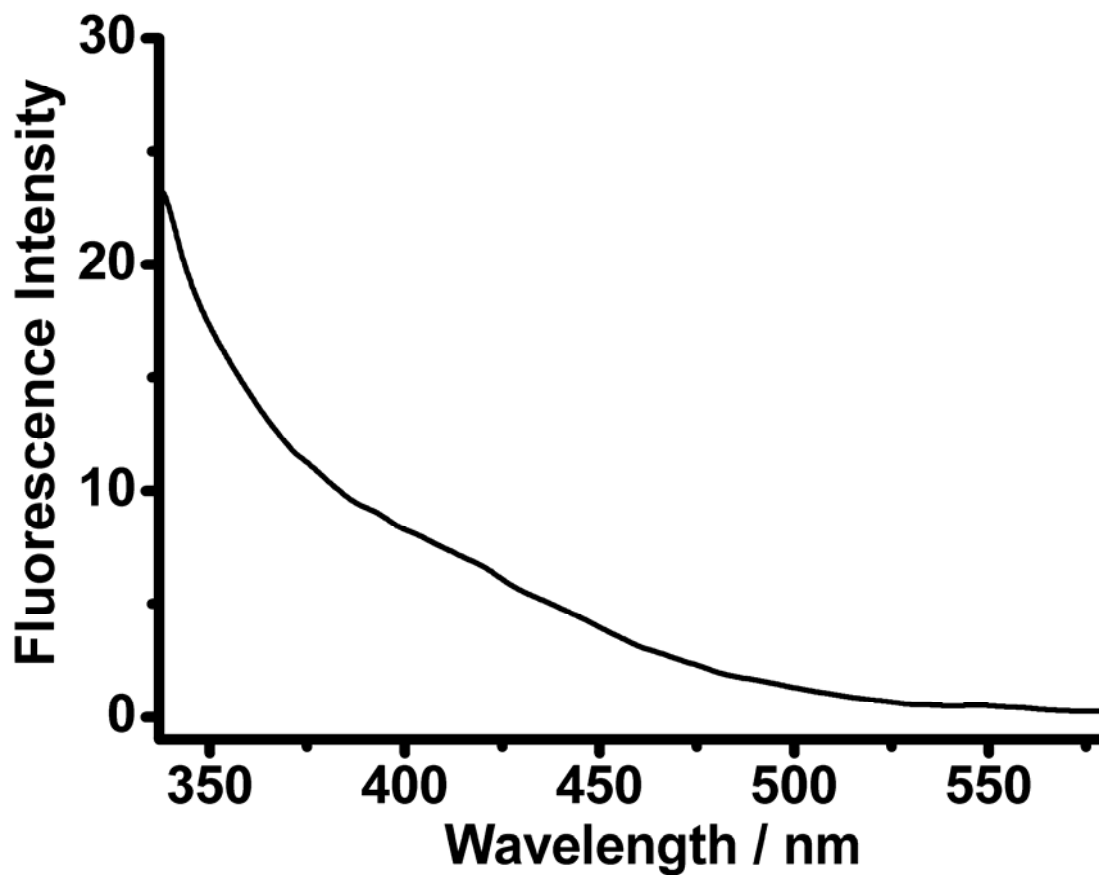

**Figure S17.** The fluorescent spectrum of **BSA•Tb** at pH 9.0 in Tris-buffer (1% DMSO, v/v) solution.

### 9. The pH dependence of the fluorescence intensity change of BSA•Eu.

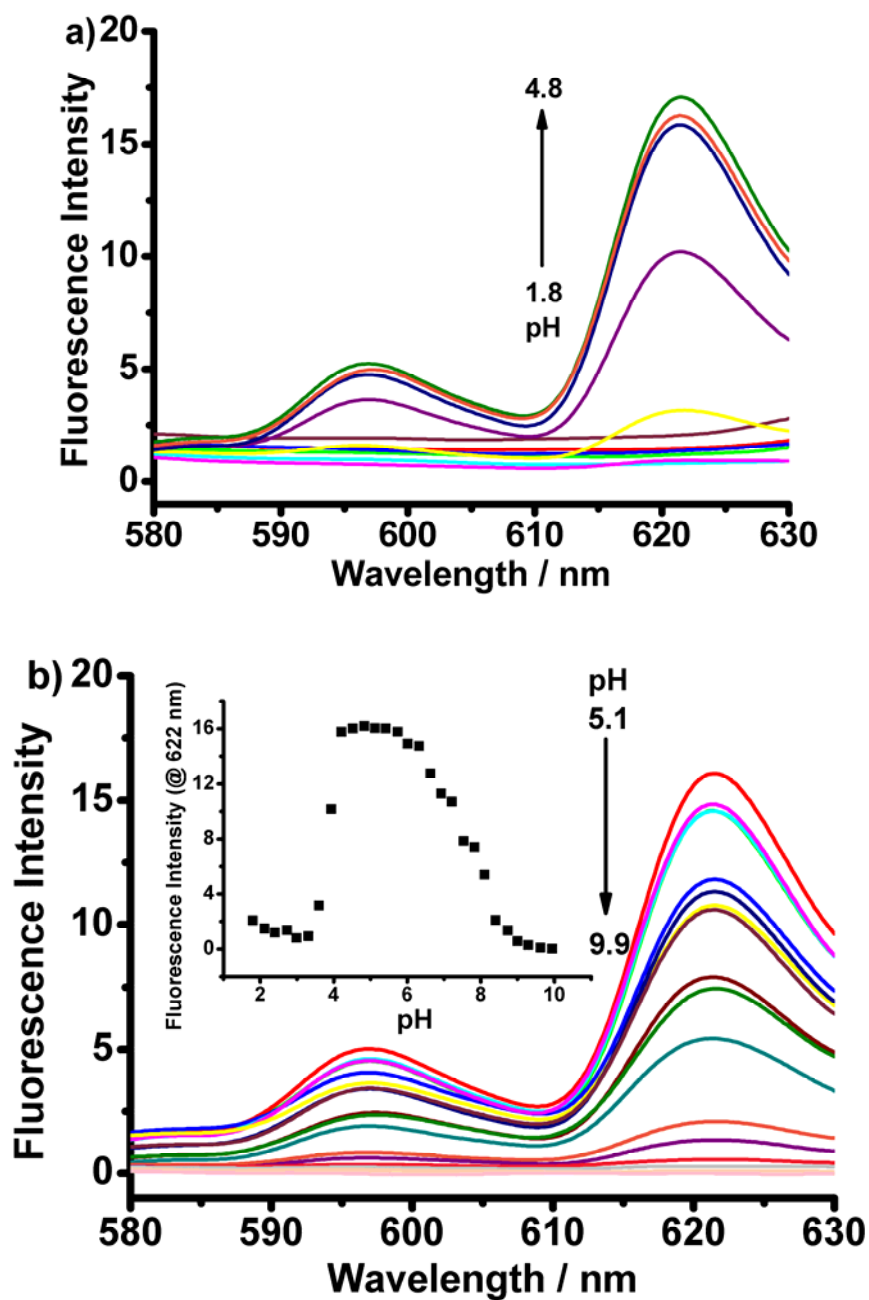

**Figure S18.** Fluorescent spectra of **BSA•Eu** (40.0 μM) in various pH values. (a) pH: 1.8, 2.1, 2.4, 2.7, 2.9, 3.0, 3.3, 3.6, 3.9, 4.2, 4.5, 4.8. (b) pH: 5.1, 5.4, 5.7, 6.0, 6.3, 6.6, 6.9, 7.2, 7.5, 7.8, 8.1, 8.4, 8.7, 9.0, 9.3, 9.6, 9.9. Inset: Fluorescence response of **BSA•Eu** to pH variation at 622 nm in Tris-buffer.

### 10. Fluorescence responses of BSA•Tb with Na<sup>+</sup>, K<sup>+</sup>, and Ca<sup>2+</sup> ions in different pH values.

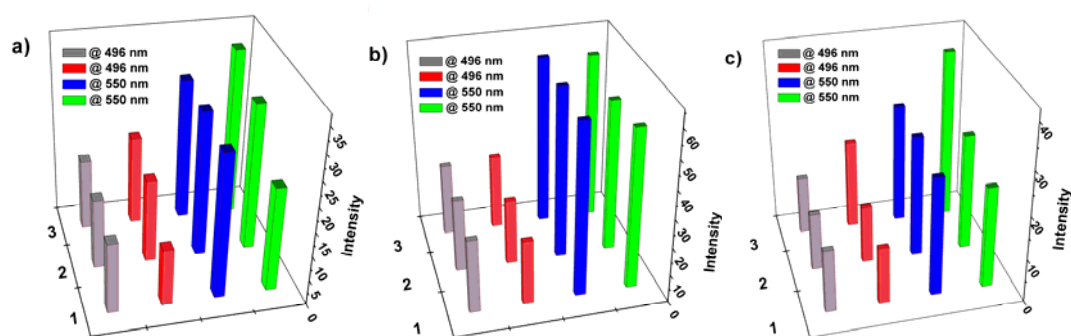

**Figure S19.** Fluorescence responses of **BSA•Tb** (20.0 μM) with Na<sup>+</sup>, K<sup>+</sup>, and Ca<sup>2+</sup> ions in different pH values. a) pH: 5.0, b) pH: 6.5, c) pH: 7.4. The gray and blue bars represent the fluorescence emission of **BSA•Tb** in Tris-buffer (1% DMSO, v/v) solution at 496 and 550 nm, respectively. The red and green bars represent the fluorescence emission of **BSA•Tb** with addition of Na<sup>+</sup> (150.0 mM), K<sup>+</sup> (4.0 mM), and Ca<sup>2+</sup> (1.0 mM) in Tris-buffer (1% DMSO, v/v) solution at 496 and 550 nm, respectively. From 1 to 3: Na<sup>+</sup>, K<sup>+</sup>, Ca<sup>2+</sup>.

### 11. Fluorescence responses of BSA•Tb with $\text{Cu}^{2+}$ , $\text{Hg}^{2+}$ , $\text{Fe}^{2+}$ , and $\text{Fe}^{3+}$ ions in different pH values.

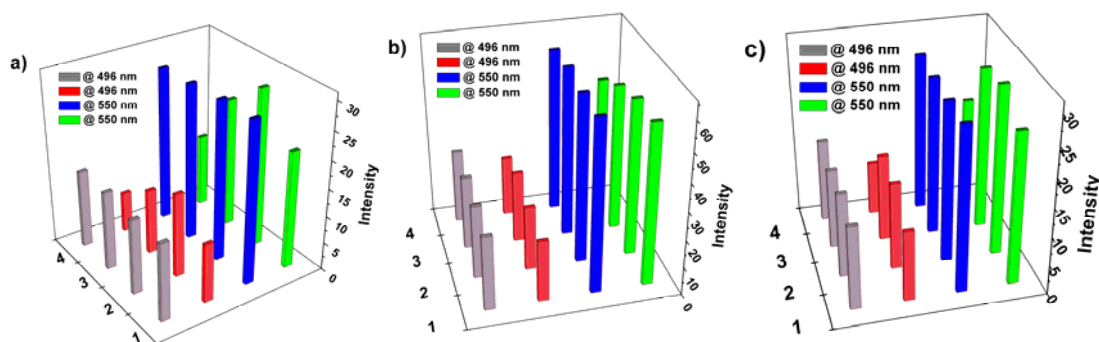

**Figure S20.** Fluorescence responses of **BSA•Tb** ( $20.0 \mu\text{M}$ ) with  $\text{Cu}^{2+}$ ,  $\text{Hg}^{2+}$ ,  $\text{Fe}^{2+}$ , and  $\text{Fe}^{3+}$  ions in different pH values. a) pH: 5.0, b) pH: 6.5, c) pH: 7.4. The gray and blue bars represent the fluorescence emission of **BSA•Tb** in Tris-buffer (1% DMSO, v/v) solution at 496 and 550 nm, respectively. The red and green bars represent the fluorescence emission of **BSA•Tb** with addition 1.0 equiv of  $\text{Cu}^{2+}$ ,  $\text{Hg}^{2+}$ ,  $\text{Fe}^{2+}$ , and  $\text{Fe}^{3+}$  in Tris-buffer (1% DMSO, v/v) solution at 496 and 550 nm, respectively. From 1 to 4:  $\text{Cu}^{2+}$ ,  $\text{Hg}^{2+}$ ,  $\text{Fe}^{2+}$ ,  $\text{Fe}^{3+}$ .

## 12. ORTEP plots of BSA•Eu and BSA•Gd.

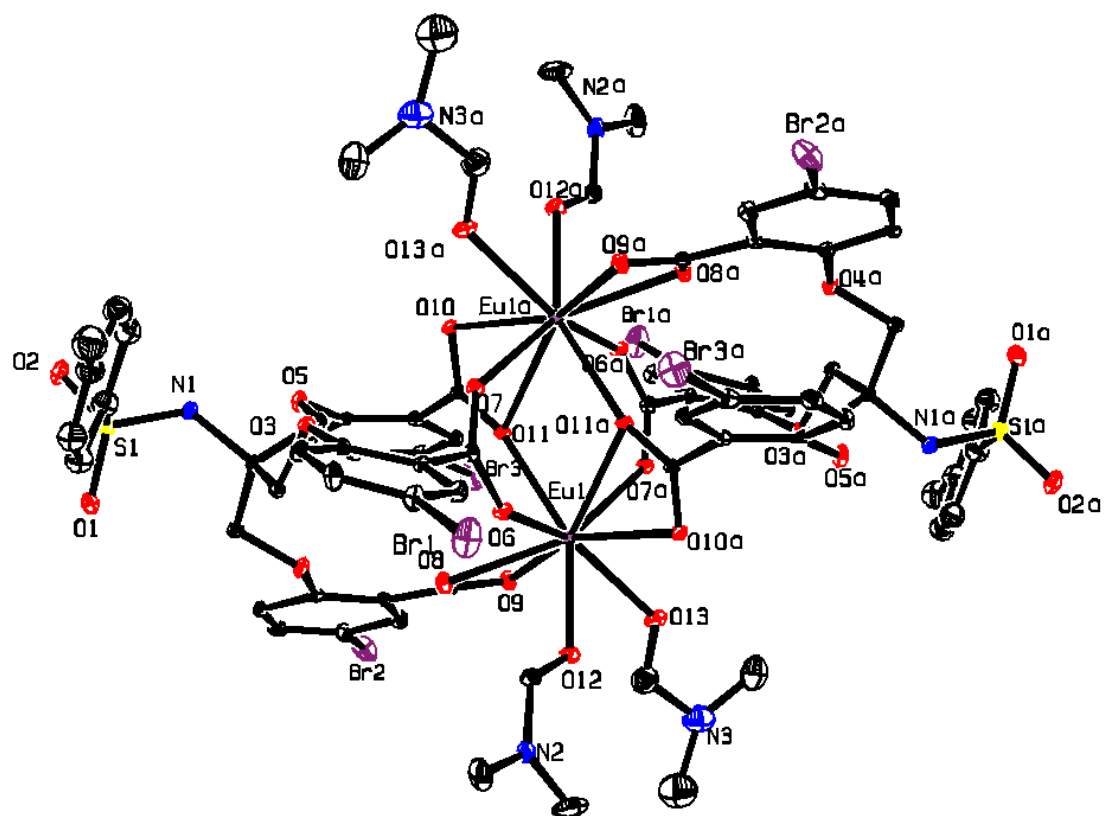

**Figure S21.** ORTEP plot of complex **BSA•Eu** with thermal ellipsoids at 30% probability (All hydrogen atoms are omitted for clarity). Symmetry operations:  $a = 1 - x, -y, 2 - z$ .

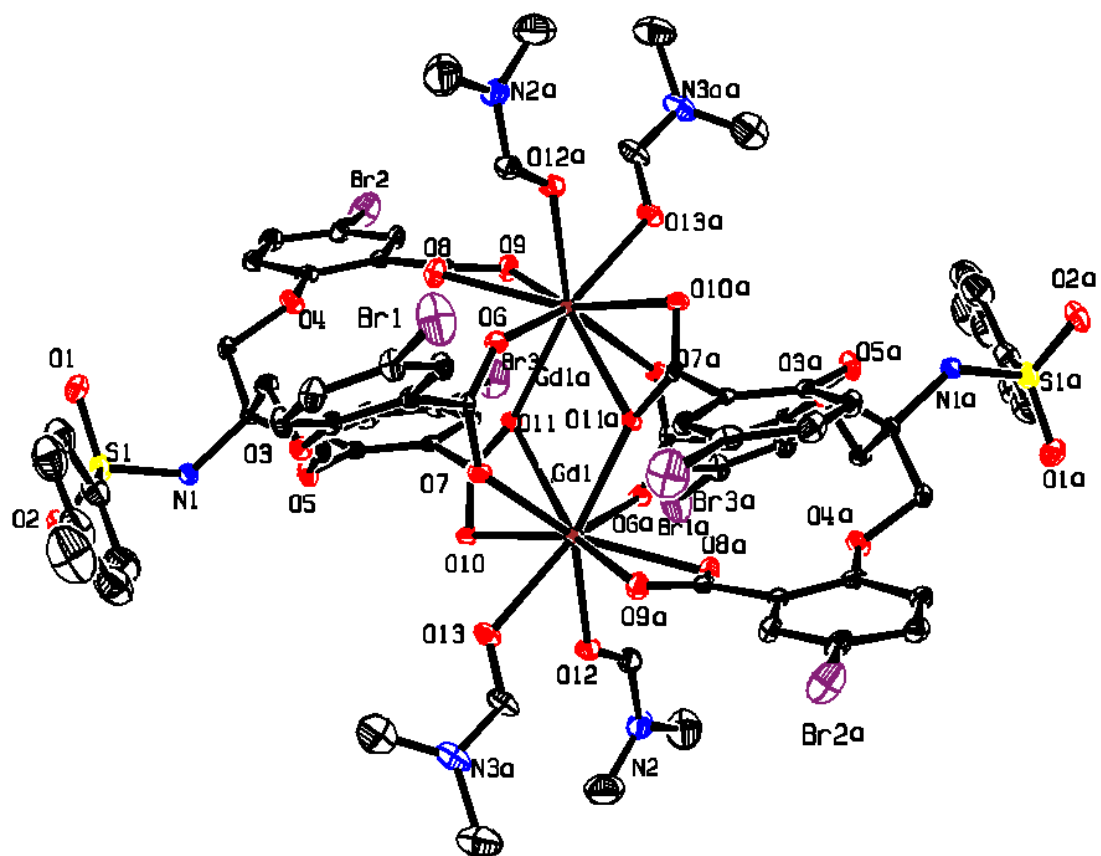

**Figure S22.** ORTEP plot of complex **BSA•Gd** with thermal ellipsoids at 30% probability (All hydrogen atoms are omitted for clarity). Symmetry operations: a = 1 - x, 1 - y, 1 - z.



### 13. Crystal data and structure refinement parameters for BSA•Eu, BSA•Gd and BSA•Tb.

**Table S1** Crystal data and structure refinement parameters for **BSA•Eu**, **BSA•Gd** and **BSA•Tb**.

| Compound                                            | <b>BSA•Eu</b>                                                                                  | <b>BSA•Gd</b>                                                                                  | <b>BSA•Tb</b>                                                                                  |
|-----------------------------------------------------|------------------------------------------------------------------------------------------------|------------------------------------------------------------------------------------------------|------------------------------------------------------------------------------------------------|
| Empirical formula                                   | C <sub>76</sub> H <sub>74</sub> Br <sub>6</sub> Eu <sub>2</sub> N <sub>6</sub> O <sub>26</sub> | C <sub>76</sub> H <sub>74</sub> Br <sub>6</sub> Gd <sub>2</sub> N <sub>6</sub> O <sub>26</sub> | C <sub>76</sub> H <sub>74</sub> Br <sub>6</sub> Tb <sub>2</sub> N <sub>6</sub> O <sub>26</sub> |
| Temperature/K                                       | 296(2)                                                                                         | 296(2)                                                                                         | 296(2)                                                                                         |
| <i>M</i>                                            | 2334.90                                                                                        | 2345.46                                                                                        | 2348.82                                                                                        |
| Crystal system                                      | Triclinic                                                                                      | Triclinic                                                                                      | Triclinic                                                                                      |
| Space group                                         | <i>P</i> -1                                                                                    | <i>P</i> -1                                                                                    | <i>P</i> -1                                                                                    |
| <i>a</i> /Å                                         | 12.839(4)                                                                                      | 12.838(2)                                                                                      | 12.818(2)                                                                                      |
| <i>b</i> /Å                                         | 12.860(4)                                                                                      | 12.867(2)                                                                                      | 12.868(2)                                                                                      |
| <i>c</i> /Å                                         | 16.021(5)                                                                                      | 16.039(3)                                                                                      | 16.038(3)                                                                                      |
| <i>a</i> /°                                         | 76.149(4)                                                                                      | 76.149(2)                                                                                      | 76.169(2)                                                                                      |
| <i>β</i> /°                                         | 87.883(4)                                                                                      | 87.850(2)                                                                                      | 87.766(2)                                                                                      |
| <i>γ</i> /°                                         | 88.339(4)                                                                                      | 88.362(2)                                                                                      | 88.385(2)                                                                                      |
| <i>V</i> /Å <sup>3</sup>                            | 2566.0(14)                                                                                     | 2570.0(7)                                                                                      | 2566.1(7)                                                                                      |
| <i>Z</i>                                            | 1                                                                                              | 1                                                                                              | 1                                                                                              |
| <i>D<sub>c</sub></i> /kg m <sup>-3</sup>            | 1.511                                                                                          | 1.515                                                                                          | 1.520                                                                                          |
| <i>μ</i> /mm <sup>-1</sup>                          | 3.653                                                                                          | 3.718                                                                                          | 3.809                                                                                          |
| <i>F</i> (000)                                      | 1148                                                                                           | 1150                                                                                           | 1152                                                                                           |
| Crystal size/mm                                     | 0.29 × 0.27 × 0.22                                                                             | 0.30 × 0.25 × 0.20                                                                             | 0.30 × 0.26 × 0.22                                                                             |
| <i>θ</i> Range for data collection/°                | 2.25-20.22                                                                                     | 2.30-21.82                                                                                     | 2.26-22.66                                                                                     |
| Index ranges, <i>hkl</i>                            | -15 ≤ <i>h</i> ≤ 15, -14 ≤ <i>k</i> ≤ 15, 0 ≤ <i>l</i> ≤ 19                                    | -15 ≤ <i>h</i> ≤ 15, -14 ≤ <i>k</i> ≤ 15, 0 ≤ <i>l</i> ≤ 19                                    | -15 ≤ <i>h</i> ≤ 14, -15 ≤ <i>k</i> ≤ 15, -19 ≤ <i>l</i> ≤ 19                                  |
| Reflections collected/unique                        | 18846/9169                                                                                     | 17141/9098                                                                                     | 18184/9034                                                                                     |
| Data/restraints/params                              | 9169/219/525                                                                                   | 9098/816/575                                                                                   | 9034/276/537                                                                                   |
| Goodness-of-fit on <i>F</i> <sup>2</sup>            | 0.932                                                                                          | 0.903                                                                                          | 0.858                                                                                          |
| Final <i>R</i> indices [ <i>I</i> > 2σ( <i>I</i> )] | <i>R</i> 1 = 0.0623, <i>wR</i> 2 = 0.1417                                                      | <i>R</i> 1 = 0.0443, <i>wR</i> 2 = 0.0846                                                      | <i>R</i> 1 = 0.0468, <i>wR</i> 2 = 0.1280                                                      |
| <i>R</i> indices (all data)                         | <i>R</i> 1 = 0.1028, <i>wR</i> 2 = 0.1567                                                      | <i>R</i> 1 = 0.0688, <i>wR</i> 2 = 0.0907                                                      | <i>R</i> 1 = 0.0674, <i>wR</i> 2 = 0.1380                                                      |

#### 14. ESI-MS spectrum of H<sub>3</sub>BSA with Tb(III) in Tris-buffer solution.

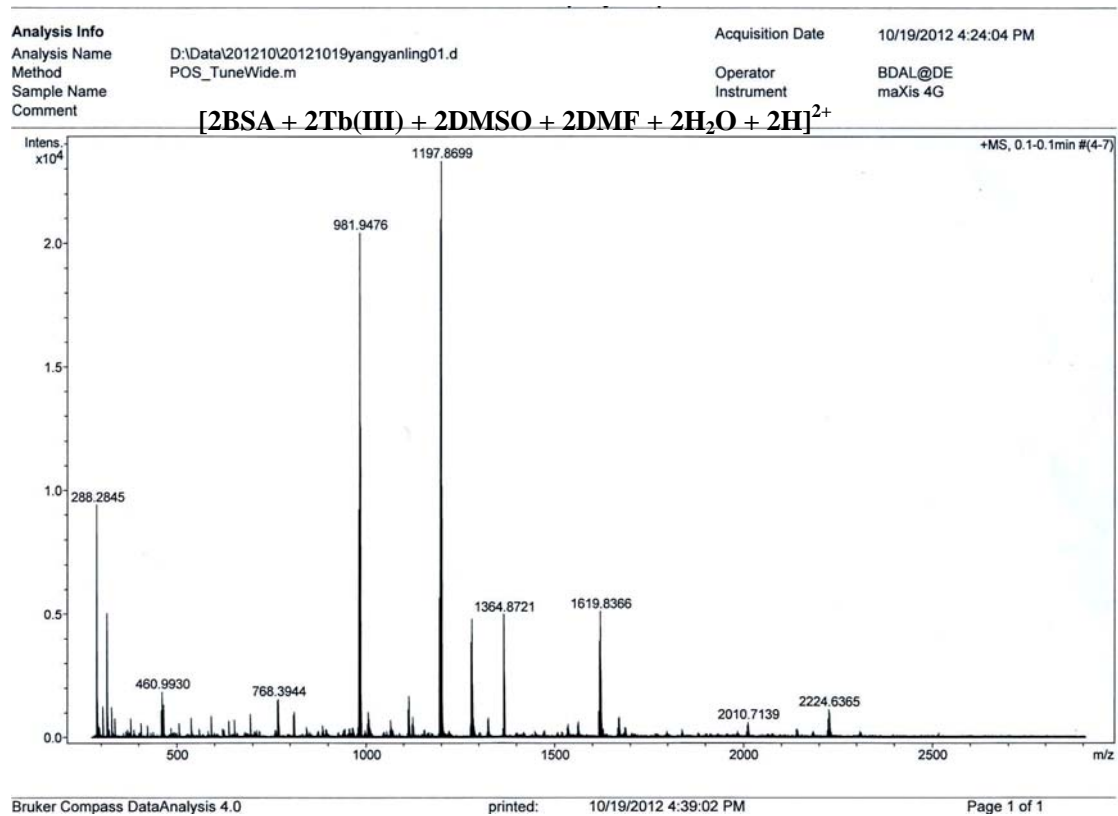

**Figure S23.** ESI-MS spectrum of H<sub>3</sub>BSA with Tb<sup>3+</sup> in Tris-buffer (1% DMSO, v/v) solution.

### 15. The supramolecular structure of BSA•Tb.

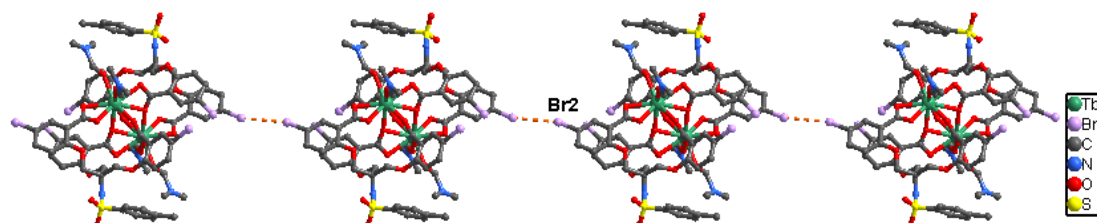

**Figure S24.** The 1D chain of **BSA•Tb** formed by Br...Br interactions indicated with dashed orange lines (Some atoms are omitted for clarity).

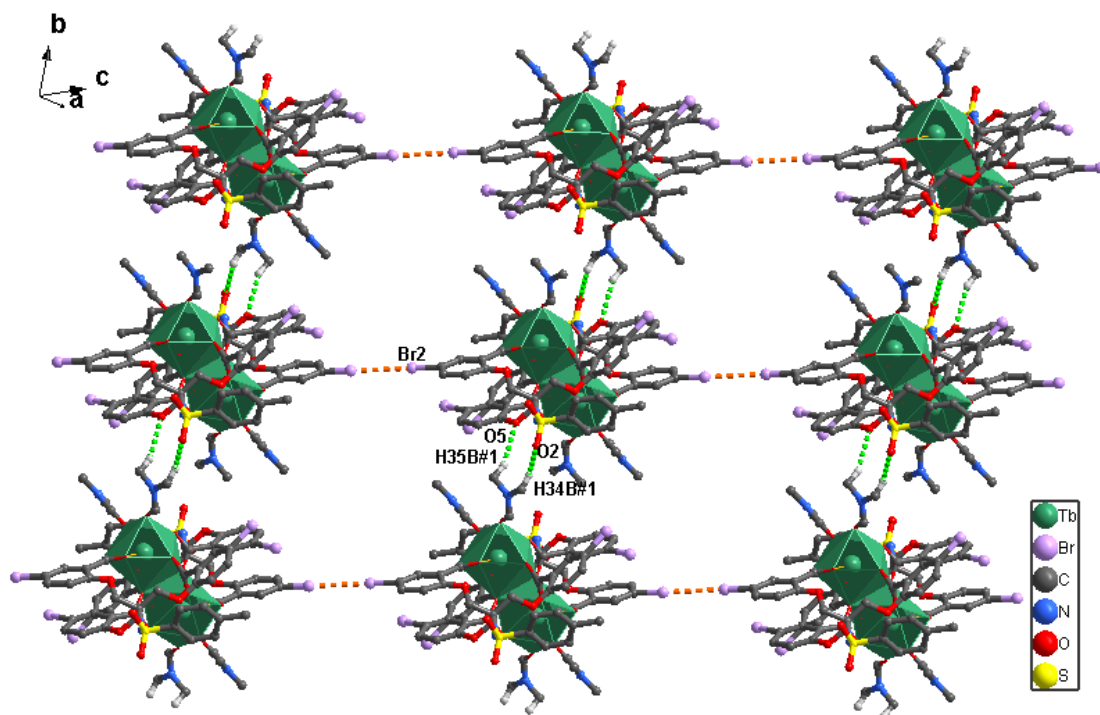

**Figure S25.** The 2D supramolecular sheet of **BSA•Tb** constructed by C-H...O hydrogen bonding indicated with dashed green lines (Some atoms are omitted for clarity). Symmetry operations: #1 = x, -1 + y, z.

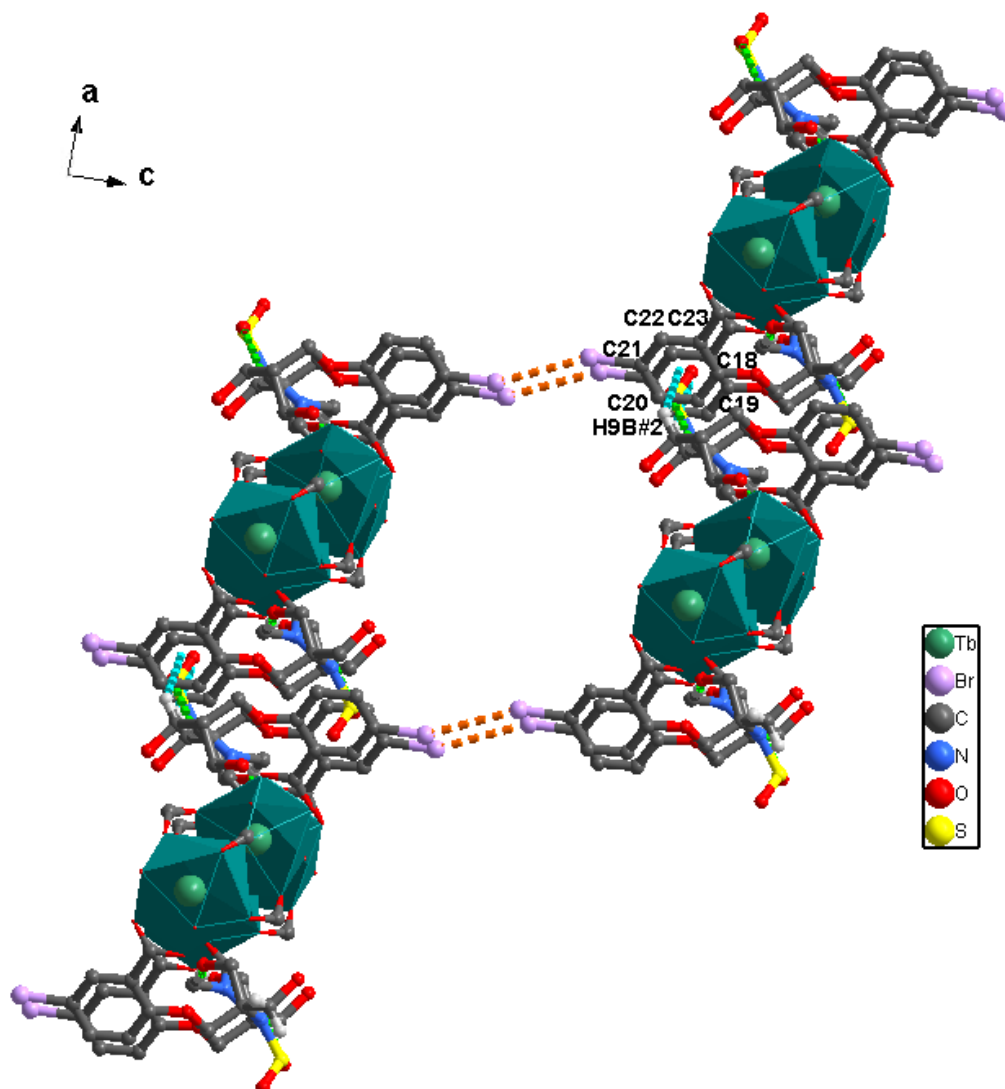

**Figure S26.** The 3D supramolecular chains of **BSA•Tb** constructed by the intermolecular T-shaped C-H... $\pi$  interactions which are indicated with dashed turquoise lines (Some atoms are omitted for clarity). Symmetry operations: #2 =  $1 - x$ ,  $1 - y$ ,  $1 - z$ .
